# Supplementary material for: Preparation of hierarchically structured Y zeolite with low Si/Al ratio and its applications in acetalization reactions
Source: Royal Society of Chemistry journal article supplement (doi:10.1039/c4ra11042k), 2014-01-01
Supplement: c4ra11042k1.pdf [file c4ra11042k1.pdf]

## Supporting Information:

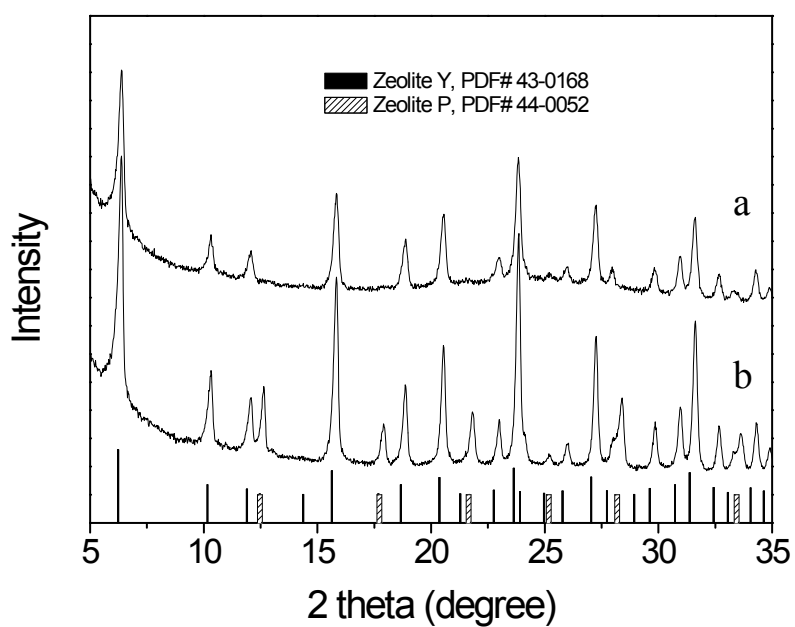

Fig. S1 XRD patterns of the samples prepared in a) ammonium water solution and b) NaOH solution in the absence of CTAB.

Table S1 Chemical properties of the samples prepared in different alkaline solutions in the absence of CTAB.

| Samples                  | Yield<br>% | R. C.<br>%      | SiO <sub>2</sub> /Al <sub>2</sub> O <sub>3</sub> |      | Na <sub>2</sub> O<br>% |
|--------------------------|------------|-----------------|--------------------------------------------------|------|------------------------|
|                          |            |                 | Framework                                        | Bulk |                        |
| NH <sub>3</sub> -0CTAB-c | 96         | 56              | --                                               | 8.14 | 3.77                   |
| NaOH-0CTAB-c             | 75         | -- <sup>a</sup> | --                                               | 6.33 | 11.57                  |

<sup>a</sup>: the formation of zeolite P.
